# Supplementary material for: Antimony doped lead-free double perovskites (Cs2NaBi1−xSbxCl6) with enhanced light absorption and tunable emission
Source: Royal Society of Chemistry journal article supplement (doi:10.1039/d0tc03003a), 2020-01-01
Supplement: d0tc03003a1.pdf [file d0tc03003a1.pdf]

## Electronic Supplementary Information

### Antimony doped lead-free double perovskites ( $\text{Cs}_2\text{NaBi}_{1-x}\text{Sb}_x\text{Cl}_6$ ) with enhanced light absorption and tunable emission

Shufang Wu,<sup>1,2</sup> Wenbo Li,<sup>1,2,3</sup> Junjie Hu,<sup>1,2,4</sup> and Peng Gao<sup>1,2,4\*</sup>

<sup>1</sup>CAS Key Laboratory of Design and Assembly of Functional Nanostructures, and Fujian Key Laboratory of Nanomaterials, Fujian Institute of Research on the Structure of Matter, Chinese Academy of Sciences, Fuzhou, Fujian 350002, China

<sup>2</sup>Laboratory of Advanced Functional Materials, Xiamen Institute of Rare Earth Materials, Haixi Institute, Chinese Academy of Sciences, Xiamen 361021, China

<sup>3</sup>Faculty of Materials Metallurgy and Chemistry, Jiangxi University of Science and Technology, Ganzhou, Jiangxi 341000, China

<sup>4</sup>University of Chinese Academy of Sciences, Beijing 100049, China

\*Correspondence: [peng.gao@fjirsm.ac.cn](mailto:peng.gao@fjirsm.ac.cn); Tel: 0592-359-4003

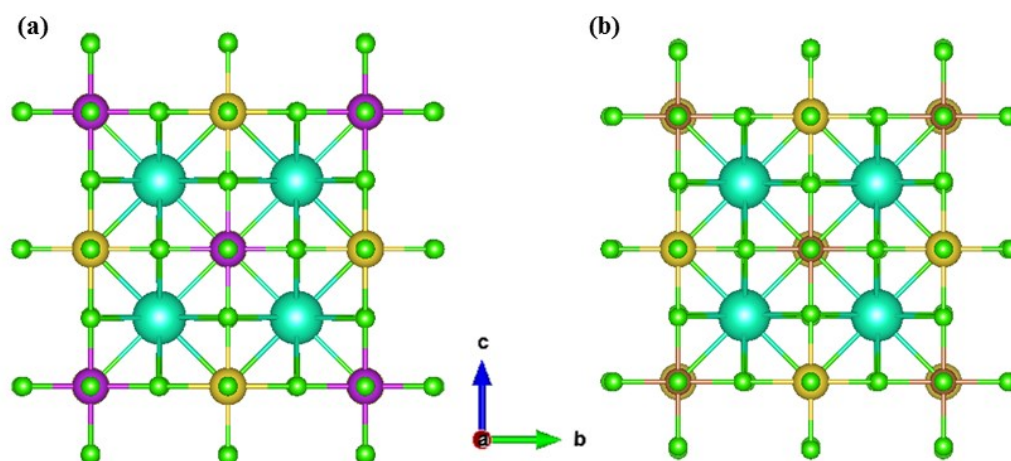

**Fig. S1.** The supercells of  $\text{Cs}_2\text{NaBiCl}_6$  (a) and  $\text{Cs}_2\text{NaSbCl}_6$  (b) for computational calculation. Cs atoms, cyan; Na atoms, yellow; Bi atoms, violet; Sb atoms, brown; Cl atoms, green.

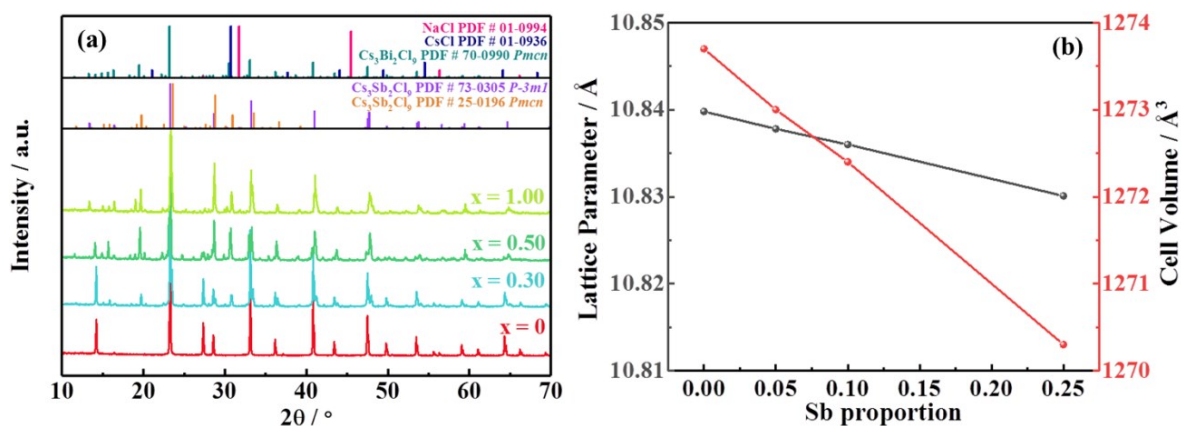

**Fig. S2.** a) The enlarged XRD patterns of  $\text{Cs}_2\text{NaBi}_{1-x}\text{Sb}_x\text{Cl}_6$  ( $x = 0, 0.3, 0.5$  and  $1.0$ ).  $\text{Cs}_3\text{Sb}_2\text{Cl}_9$ ,  $\text{CsCl}$ ,  $\text{NaCl}$  and other by-products are produced when  $x \geq 0.3$ . b) The variation of cubic crystal lattice parameter and cell volume, as a function of  $\text{Sb}^{3+}$  substitution proportion. The values of lattice parameter and cell volume are derived by using the Rietveld method.

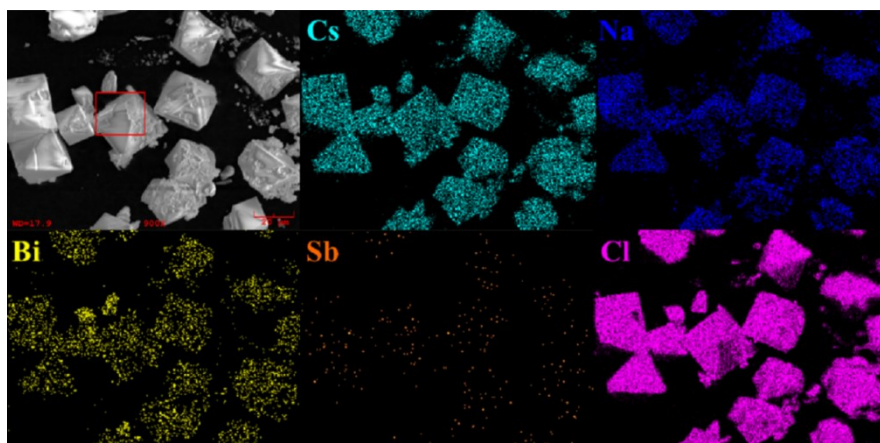

**Fig. S3.** EDS elemental mapping of Cs, Na, Bi, Sb and Cl elements in  $\text{Cs}_2\text{NaBi}_{0.95}\text{Sb}_{0.05}\text{Cl}_6$  double perovskite microcrystals.

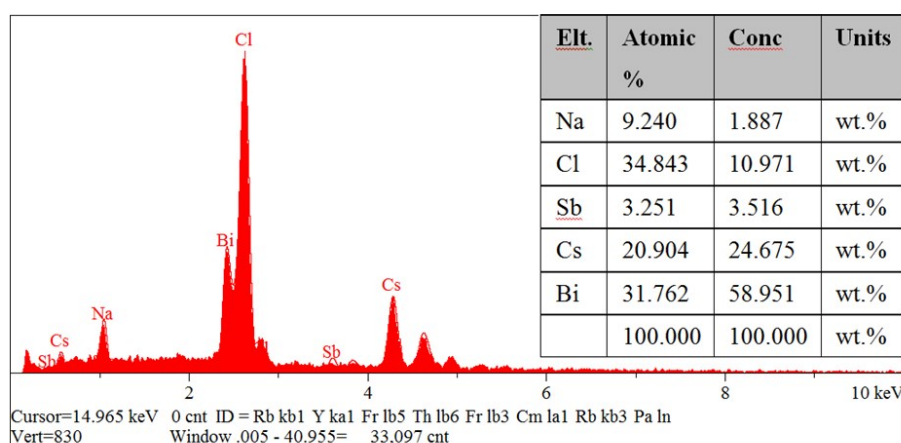

**Fig. S4.** EDS spectra for  $\text{Cs}_2\text{NaBi}_{0.95}\text{Sb}_{0.05}\text{Cl}_6$  double perovskite microcrystals. The inset table presents the corresponding approximate element quantification.

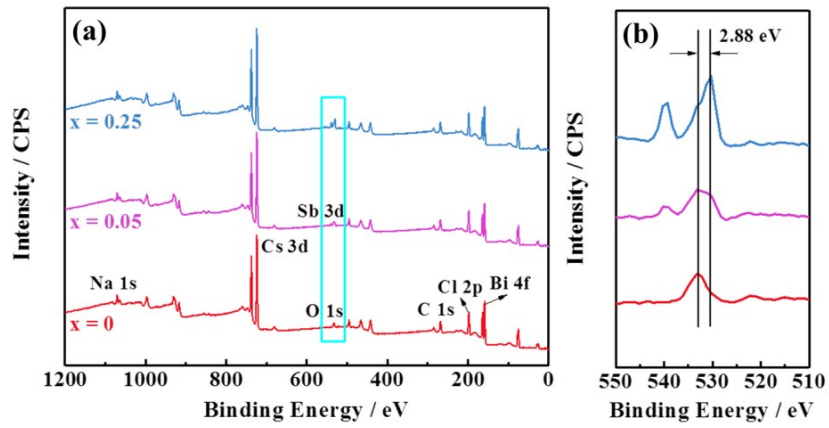

**Fig. S5.** XPS survey spectra (a), and the amplified peaks attributed to O 1s and Sb 3d (b) of  $\text{Cs}_2\text{NaBi}_{1-x}\text{Sb}_x\text{Cl}_6$  ( $x = 0, 0.05$  and  $0.25$ ).

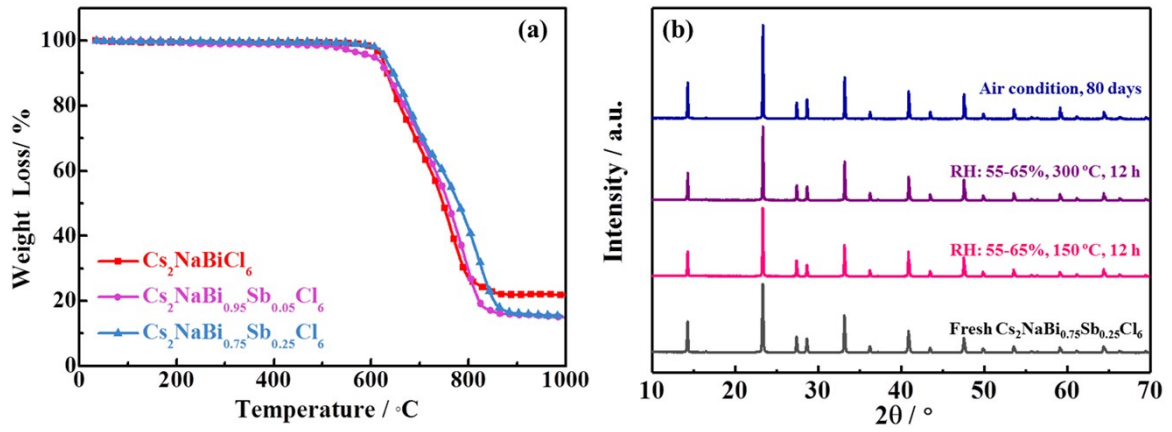

**Fig. S6.** (a) TGA data for  $\text{Cs}_2\text{NaBi}_{1-x}\text{Sb}_x\text{Cl}_6$  ( $x = 0, 0.05$  and  $0.25$ ). (b) PXRD patterns of  $\text{Cs}_2\text{NaBi}_{0.75}\text{Sb}_{0.25}\text{Cl}_6$  measured under different conditions.

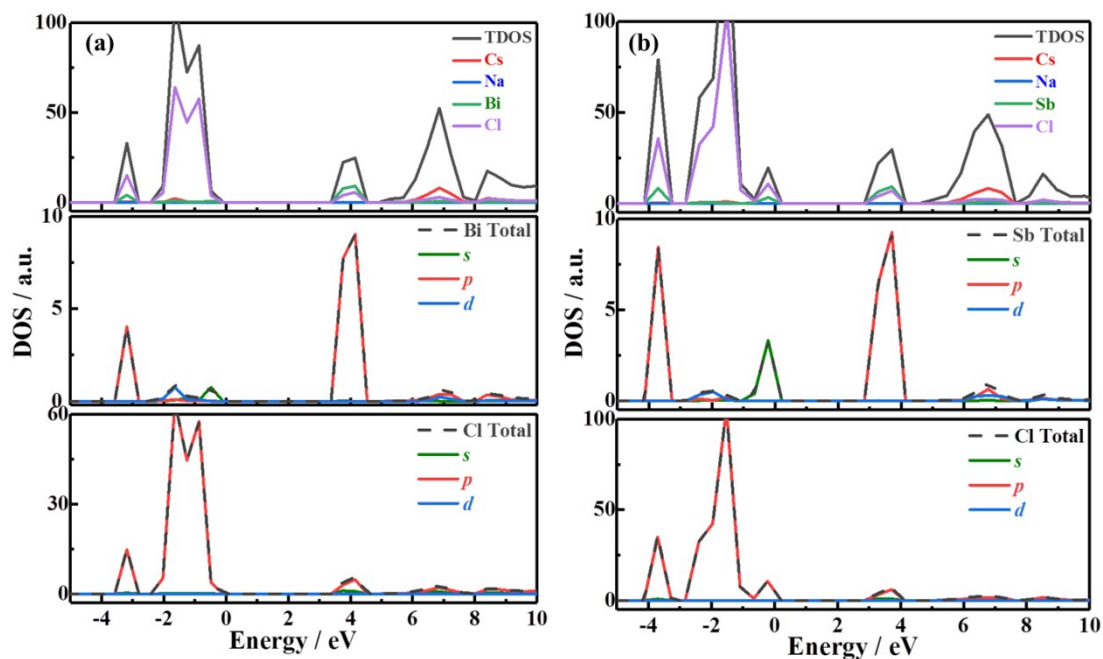

**Fig. S7.** Electronic density of states (DOS) for  $\text{Cs}_2\text{NaBiCl}_6$  (a) and  $\text{Cs}_2\text{NaSbCl}_6$  (b).

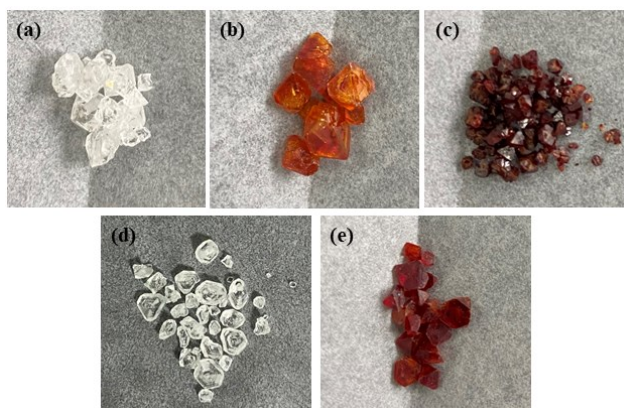

**Fig. S8.** Pictures for the crystals of  $\text{Cs}_2\text{NaBiCl}_6$  (a, d),  $\text{Cs}_2\text{NaBi}_{0.95}\text{Sb}_{0.05}\text{Cl}_6$  (b, e), and  $\text{Cs}_2\text{NaBi}_{0.9}\text{Sb}_{0.1}\text{Cl}_6$  (c) and  $\text{Cs}_2\text{NaBi}_{0.95}\text{Sb}_{0.05}\text{Cl}_6$  (d) under daylight, prepared from the reaction solution with adding 3  $\mu\text{l}$   $\text{HNO}_3$  (a-c) or 5  $\mu\text{l}$   $\text{H}_2\text{O}_2$  (d, e).

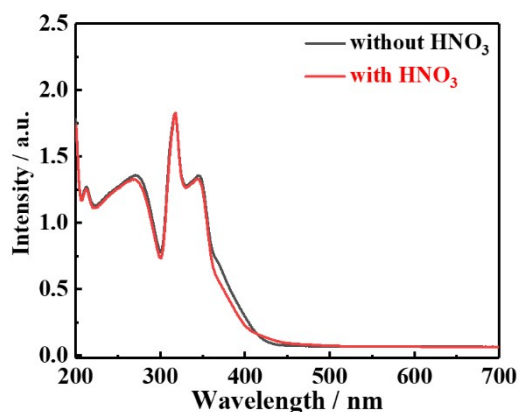

**Fig. S9.** Steady-state absorption spectra of  $\text{CsNaBiCl}_6$  without and with  $\text{HNO}_3$  (3  $\mu\text{l}$ ) in the hydrothermal reaction.

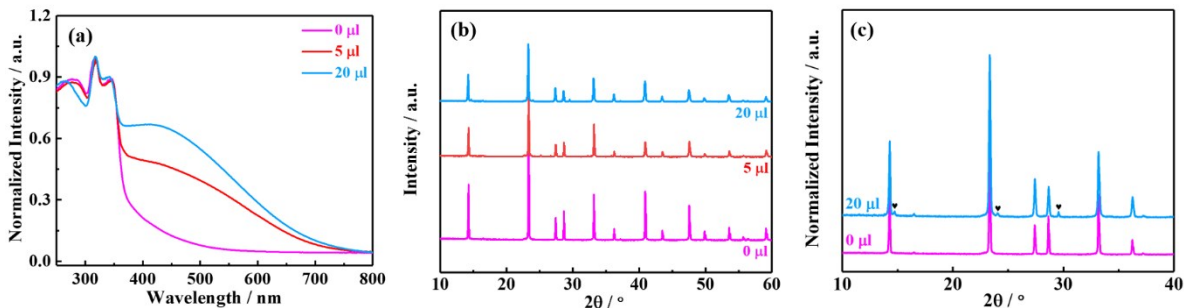

**Fig. S10.** Steady-state absorption spectra (a), PXRD patterns (b) and the normalized XRD patterns (c) of  $\text{Cs}_2\text{NaBi}_{0.95}\text{Sb}_{0.05}\text{Cl}_6$  double perovskites with different amounts of  $\text{H}_2\text{O}_2$  added in the hydrothermal reaction. Some weak diffraction peaks (marked with the symbol ♥) that can be indexed to  $\text{Cs}_2\text{Bi}_{0.5}\text{Sb}_{0.5}\text{Cl}_6$ , are also observed in  $\text{Cs}_2\text{NaBi}_{0.95}\text{Sb}_{0.05}\text{Cl}_6$  crystals prepared by adding 20  $\mu\text{l}$   $\text{H}_2\text{O}_2$ .

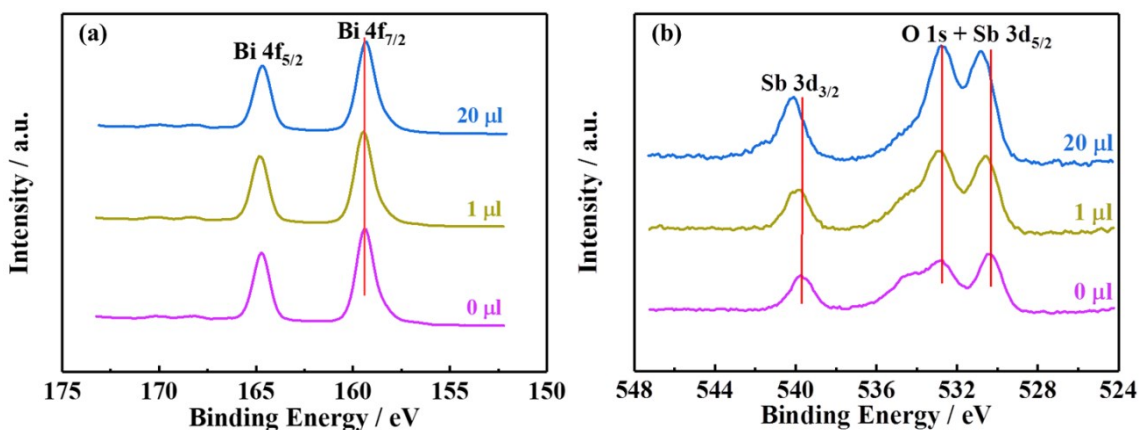

**Fig. S11.** Bi 4f (a) and Sb 3d (b) XPS spectra for  $\text{Cs}_2\text{NaBi}_{0.95}\text{Sb}_{0.05}\text{Cl}_6$  with different amounts of diluted  $\text{HNO}_3$  added in the hydrothermal reaction.

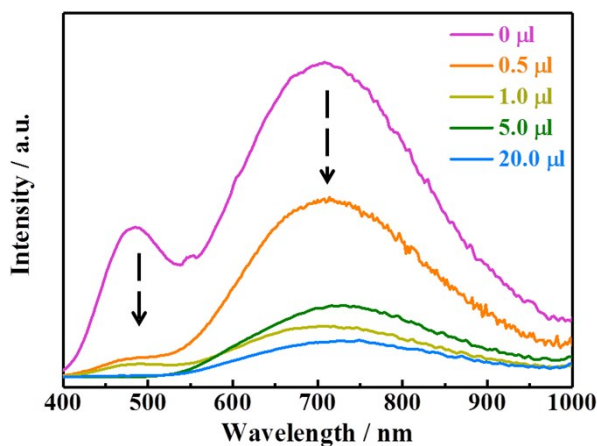

**Fig. S12.** PL spectra of  $\text{Cs}_2\text{NaBi}_{0.95}\text{Sb}_{0.05}\text{Cl}_6$  double perovskites with different amounts of diluted  $\text{HNO}_3$  added in the hydrothermal reaction.

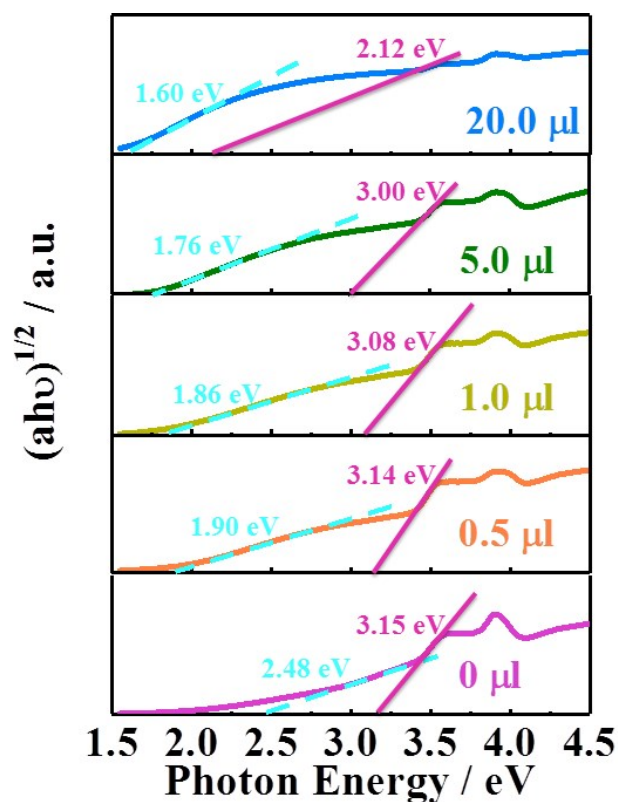

**Fig. S13.** Tauc plots of  $\text{Cs}_2\text{NaBi}_{0.95}\text{Sb}_{0.05}\text{Cl}_6$  double perovskites with different amounts of diluted  $\text{HNO}_3$  added in the hydrothermal reaction. The band-gap values are extracted by linear fitting to indirect band-gap Tauc plots.

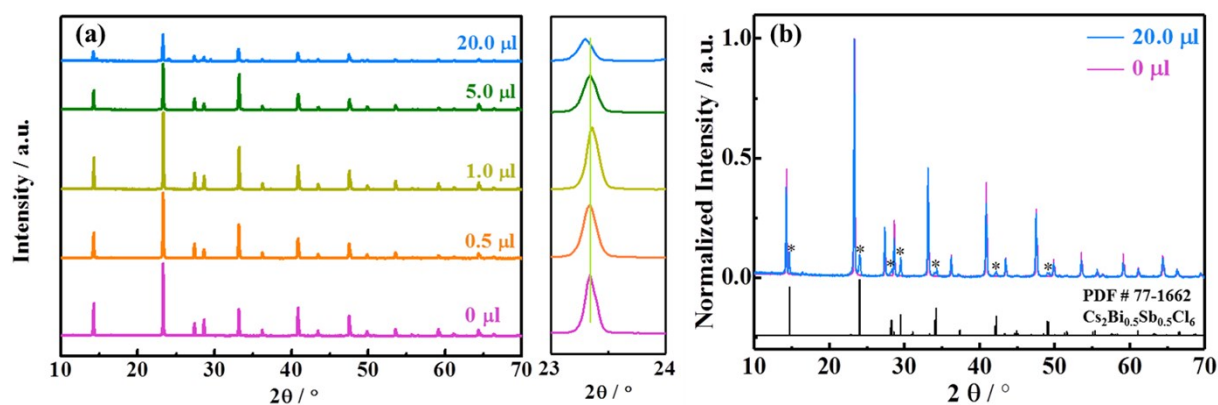

**Fig. S14.** The effect of adding diluted  $\text{HNO}_3$  in the hydrothermal reaction on the crystal structure. a) PXRD patterns and the enlarged diffraction peaks between  $23^\circ \sim 24^\circ$  of  $\text{Cs}_2\text{NaBi}_{0.95}\text{Sb}_{0.05}\text{Cl}_6$  double perovskites with different amounts of diluted  $\text{HNO}_3$ . b) The normalized XRD patterns of  $\text{Cs}_2\text{NaBi}_{0.95}\text{Sb}_{0.05}\text{Cl}_6$  with 0  $\mu\text{l}$  and 20  $\mu\text{l}$  diluted  $\text{HNO}_3$ . Second phase was observed in  $\text{Cs}_2\text{NaBi}_{0.95}\text{Sb}_{0.05}\text{Cl}_6$  crystals with 20  $\mu\text{l}$  diluted  $\text{HNO}_3$ .

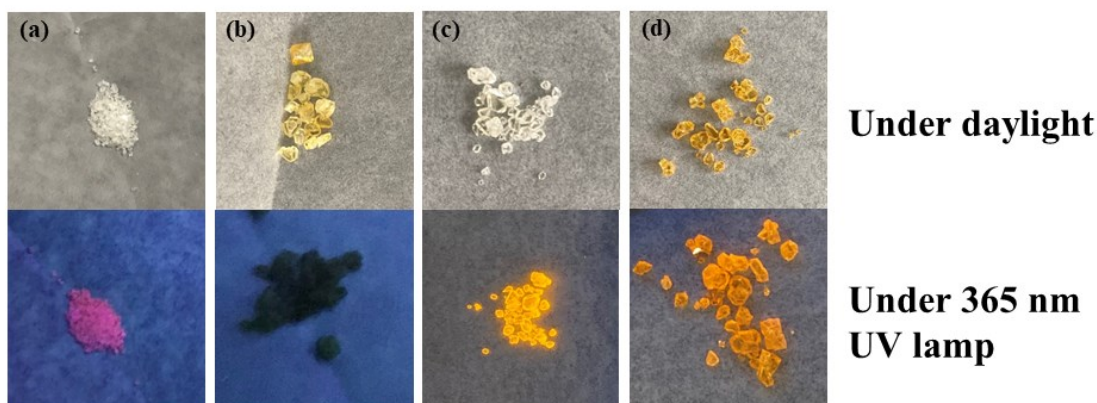

**Fig. S15.** Pictures for the as-prepared crystals of  $\text{Cs}_2\text{NaBiCl}_6$  (a),  $\text{Cs}_2\text{NaBi}_{0.75}\text{Sb}_{0.25}\text{Cl}_6$  (b),  $\text{Mn}^{2+}$  doped  $\text{Cs}_2\text{NaBiCl}_6$  (c), and  $\text{Mn}^{2+}$  doped  $\text{Cs}_2\text{NaBi}_{0.75}\text{Sb}_{0.25}\text{Cl}_6$  (d) under daylight (upper) and 365 nm UV light (bottom). The input mole ratio of  $\text{Mn}^{2+}/\text{Na}^+$  in  $\text{Mn}^{2+}$  doped crystals is 0.2.

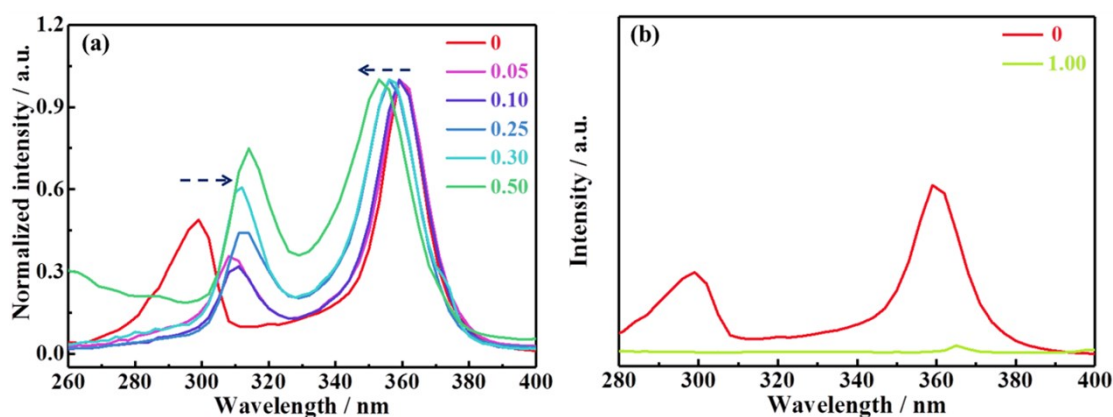

**Fig. S16.** (a) Photoluminescence excitation spectra (PLE) of  $\text{Cs}_2\text{NaBi}_{1-x}\text{Sb}_x\text{Cl}_6$  monitored at 480 nm excepting  $\text{Cs}_2\text{NaBiCl}_6$  (at 700 nm). (b) The comparison of the PLE curves for  $\text{Cs}_2\text{NaBiCl}_6$  and  $\text{Cs}_2\text{NaSbCl}_6$ .

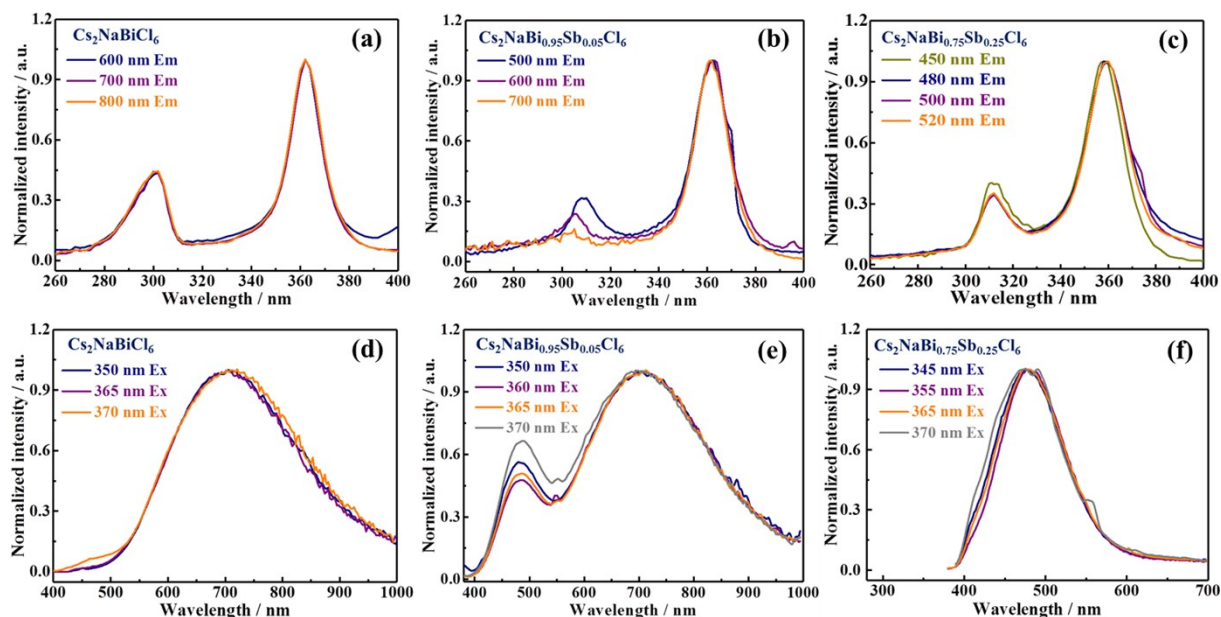

**Fig. S17.** Emission-wavelength-dependent PLE (a-c) and excitation-wavelength-dependent PL (d-f) spectra of  $\text{Cs}_2\text{NaBiCl}_6$  (a, d),  $\text{Cs}_2\text{NaBi}_{0.95}\text{Sb}_{0.05}\text{Cl}_6$  (b, e), and  $\text{Cs}_2\text{NaBi}_{0.75}\text{Sb}_{0.25}\text{Cl}_6$  (c, f).

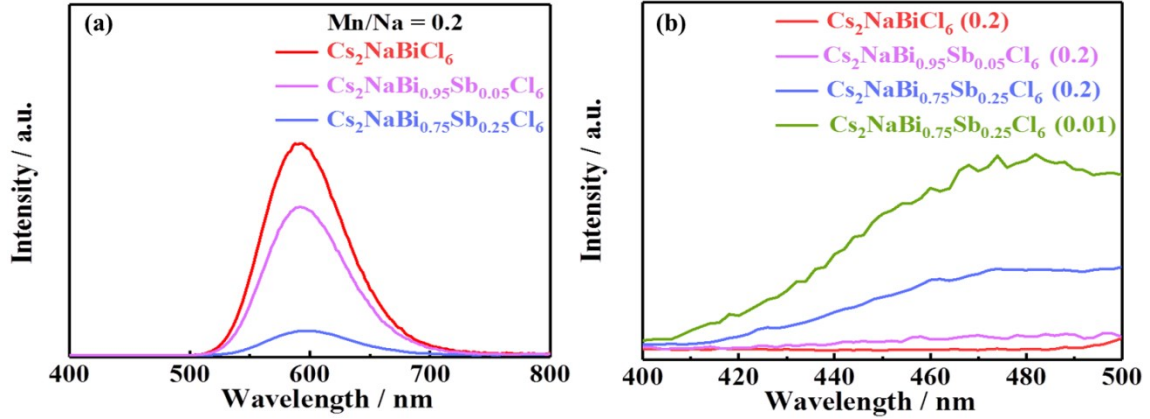

**Fig. S18.** PL spectra for  $\text{Mn}^{2+}$  doped  $\text{Cs}_2\text{NaBi}_{1-x}\text{Sb}_x\text{Cl}_6$  ( $x = 0, 0.05$  and  $0.25$ ) with emission peaks centered at 590 nm (a), and 480 nm with amplifying intensity (b). The input mole ratio of  $\text{Mn}^{2+}/\text{Na}^+$  in samples is 0.2 or 0.01.

**Table S1** Elemental analysis of  $\text{Cs}_2\text{NaBi}_{1-x}\text{Sb}_x\text{Cl}_6$  measured by ICP-OES.

| samples                                                                      | Mass Concentration (mg / mL) |        |       | Molar Ratio |       |
|------------------------------------------------------------------------------|------------------------------|--------|-------|-------------|-------|
|                                                                              | Na                           | Bi     | Sb    | Bi/Na       | Sb/Na |
| $\text{Cs}_2\text{NaBiCl}_6$                                                 | 13.98                        | 119.69 | ---   | 0.94        | ---   |
| $\text{Cs}_2\text{NaBi}_{0.95}\text{Sb}_{0.05}\text{Cl}_6$                   | 15.27                        | 138.61 | 2.29  | 0.998       | 0.03  |
| $\text{Cs}_2\text{NaBi}_{0.9}\text{Sb}_{0.1}\text{Cl}_6$                     | 15.03                        | 273.37 | 8.86  | 0.86        | 0.05  |
| $\text{Cs}_2\text{NaBi}_{0.75}\text{Sb}_{0.25}\text{Cl}_6$                   | 34.92                        | 97.44  | 8.66  | 0.71        | 0.11  |
| $\text{Cs}_2\text{NaBi}_{0.7}\text{Sb}_{0.3}\text{Cl}_6$                     | 6.36                         | 54.97  | 11.23 | 0.95        | 0.33  |
| $\text{Cs}_2\text{NaBi}_{0.5}\text{Sb}_{0.5}\text{Cl}_6$                     | 1.68                         | 28.51  | 26.10 | 1.87        | 2.93  |
| $\text{Cs}_2\text{NaSbCl}_6$                                                 | 1.11                         | ---    | 65.09 | ---         | 11.06 |
| $\text{Cs}_2\text{NaBiSb}_{0.05}\text{Cl}_6$<br>(with 20 ml $\text{HNO}_3$ ) | 15.14                        | 151.22 | 2.98  | 1.11        | 0.04  |

**Table S2** Carrier lifetime derived from the decay curves of PL by fitting with bi-exponentials.

| Wavelength | sample                                                     | $\tau_1/\text{ns}$ | $A_1$ | $\tau_2/\text{ns}$ | $A_2$ | Average $\tau/\text{ns}$ |
|------------|------------------------------------------------------------|--------------------|-------|--------------------|-------|--------------------------|
| 700 nm     | $\text{Cs}_2\text{NaBiCl}_6$                               | 1.82               | 0.54  | 5.69               | 0.43  | 3.54                     |
|            | $\text{Cs}_2\text{NaBi}_{0.95}\text{Sb}_{0.05}\text{Cl}_6$ | 1.97               | 1.03  | 12.13              | 0.07  | 2.62                     |
| 480 nm     | $\text{Cs}_2\text{NaBi}_{0.95}\text{Sb}_{0.05}\text{Cl}_6$ | 2.67               | 0.85  | 14.06              | 0.15  | 4.38                     |
|            | $\text{Cs}_2\text{NaBi}_{0.75}\text{Sb}_{0.25}\text{Cl}_6$ | 2.21               | 1.08  | 14.58              | 0.04  | 2.60                     |

Average  $\tau$  is calculated according to the equation: Average  $\tau = (A_1\tau_1 + A_2\tau_2) / (A_1 + A_2)$
